# Supplementary material for: Toxic gas sensing performance of arsenene functionalized by single atoms (Ag, Au): a DFT study
Source: Royal Society of Chemistry journal article supplement (doi:10.1039/d3ra07816g), 2024-01-01
Supplement: d3ra07816g1.pdf [file d3ra07816g1.pdf]

## Supplementary Information

### Toxic Gas Sensing Performance of Arsenene functionalized by Single-atom (Ag, Au): a DFT Study

Ping Wu<sup>1</sup>, Zihao Zhao<sup>2</sup>, Zijie Huang<sup>2</sup>, Min Huang<sup>2,\*</sup>

*<sup>1</sup>Shandong Engineering Research Center of New Optoelectronic Information Technology and Devices, School of Mathematics and Physics, Qingdao University of Science & Technology, Qingdao 266061, People's Republic of China*

*<sup>2</sup>School of Physics, Key Laboratory of Intelligent Sensing System and Security (Hubei University), Ministry of Education, Hubei University, Wuhan 430062, People's Republic of China.*

*\* Corresponding author, E-mail address: [huangmin@hubu.edu.cn](mailto:huangmin@hubu.edu.cn)*

**Table S1** Total energy ( $E_t$ ) of NO/Ag-arsenene after fully relaxation with various K-points in supercell of (4×4×1).

|            |           |           |           |
|------------|-----------|-----------|-----------|
| K-points   | 5×5×1     | 7×7×1     | 9×9×1     |
| $E_t$ (eV) | -163.3871 | -163.3862 | -163.3859 |

**Table S2** Total energy ( $E_t$ ) of NO/Ag-arsenene after fully relaxation with various energy cutoff.

|                           |           |           |           |           |
|---------------------------|-----------|-----------|-----------|-----------|
| $E_{\text{cut-off}}$ (eV) | 400       | 420       | 450       | 500       |
| $E_t$ (eV)                | -163.3891 | -163.3871 | -163.3862 | -163.3894 |

**Table S3** Total energy ( $E_t$ ) for NO/Ag-arsenene system with different vacuum height.

|                  |           |           |           |
|------------------|-----------|-----------|-----------|
| vacuum height(Å) | 20        | 22        | 25        |
| $E_t$ (eV)       | -163.3862 | -163.3865 | -163.3862 |

**Table S4** Adsorption energy ( $E_{\text{ads}}$ ) for NO adsorbed on Ag-arsenene surface with different size of supercell.

|                       |        |        |        |
|-----------------------|--------|--------|--------|
| supercell             | 4×4×1  | 5×5×1  | 6×6×1  |
| $E_{\text{ads}}$ (eV) | -0.724 | -0.726 | -0.727 |

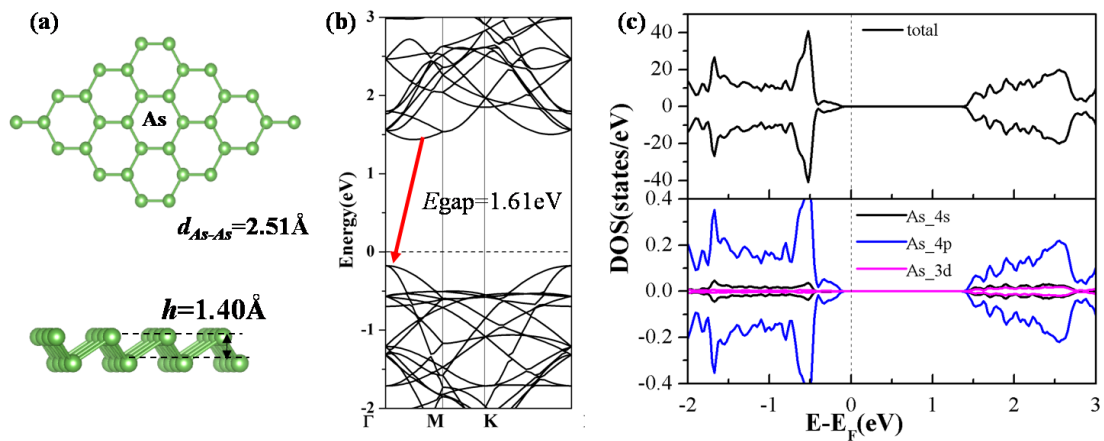

**Figure S1 (a)-(c)** Optimized structures, band structure and density of states (PDOS) for pristine arsenene, respectively.

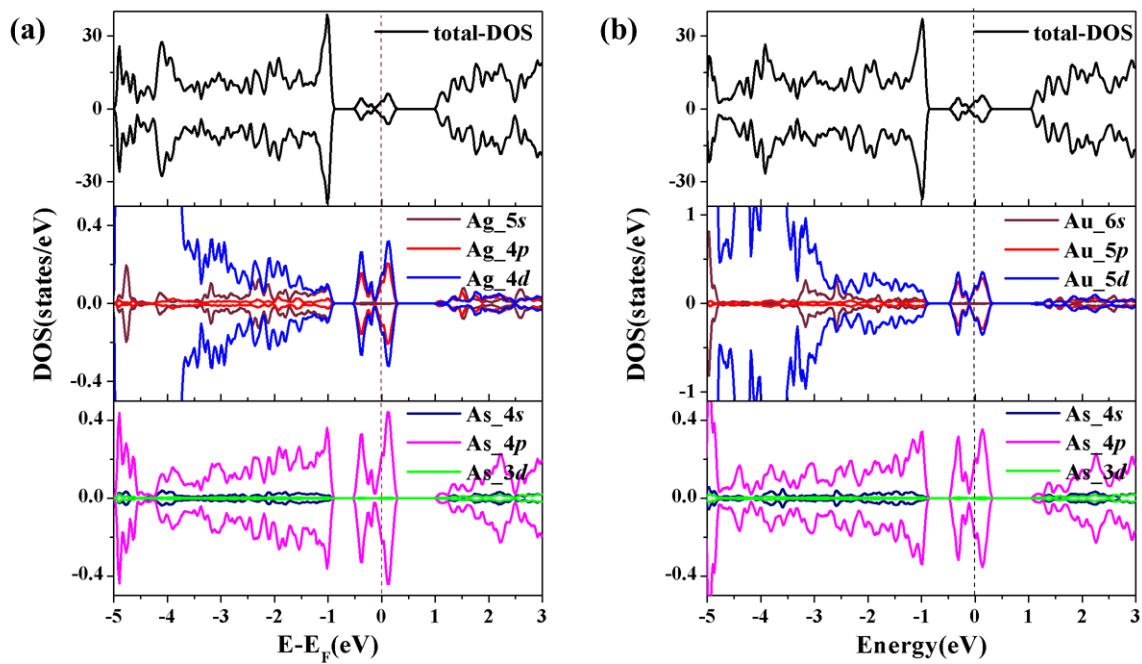

**Figure S2 (a)-(b)** Total density of states (TDOS) and Project Density of states (PDOS) for Ag and Au-doped arsenene systems, respectively.

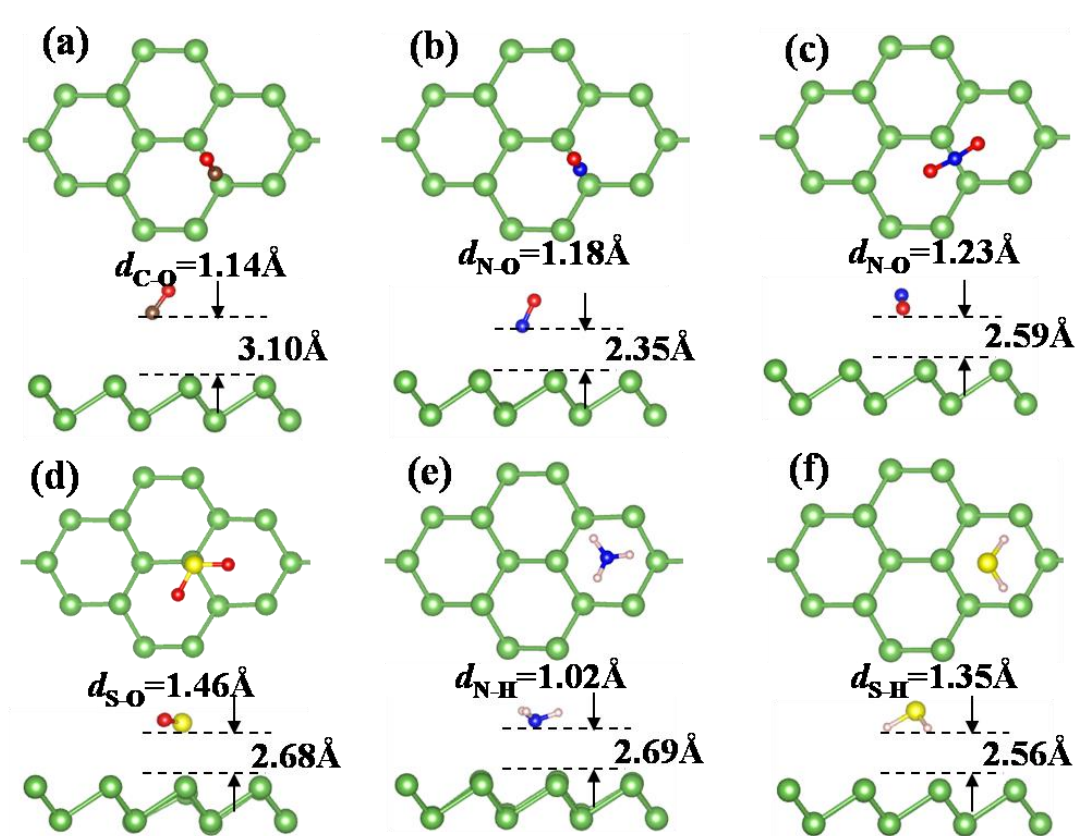

**Figure S3** (a)-(f) Top (upper panel) and side views (lower panel) of the most favorable configurations of pristine arsenene with adsorption of CO, NO, NO<sub>2</sub>, SO<sub>2</sub>, NH<sub>3</sub> and H<sub>2</sub>S, respectively.

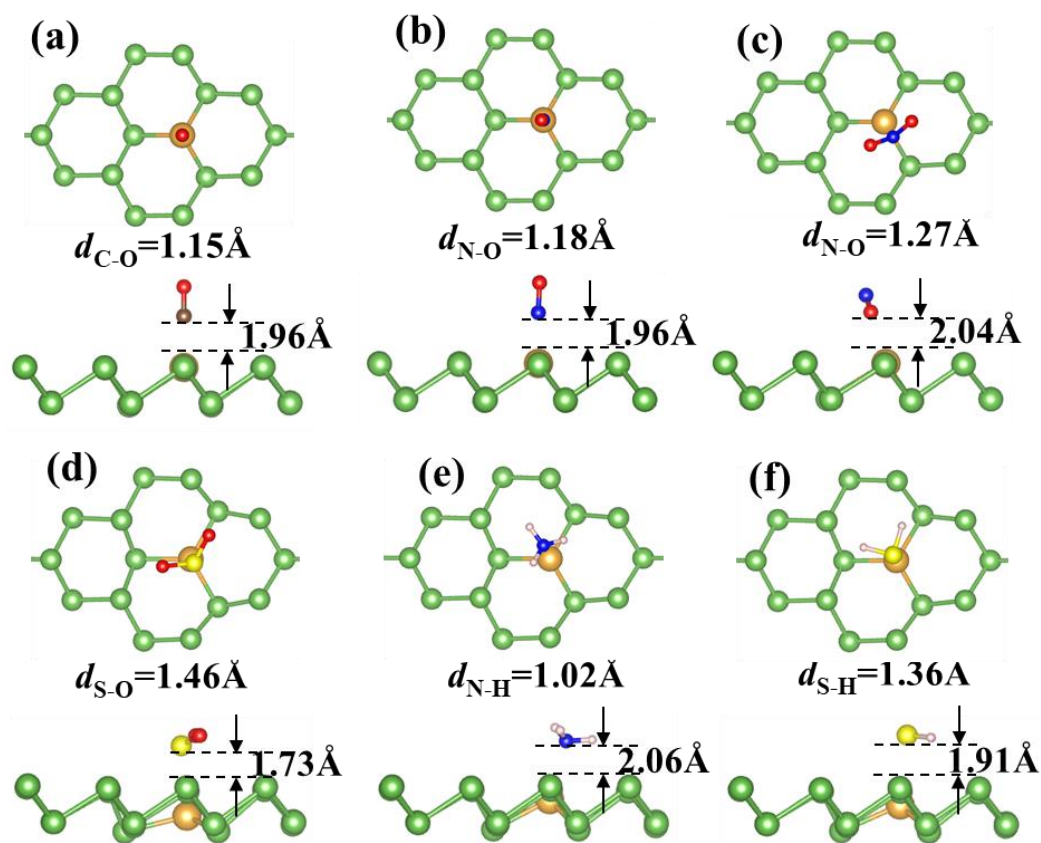

**Figure S4** (a)-(f) Top (upper panel) and side views (lower panel) of the most favorable configurations of Au-arsenene with the adsorption of CO, NO, NO<sub>2</sub>, SO<sub>2</sub>, NH<sub>3</sub> and H<sub>2</sub>S, respectively.

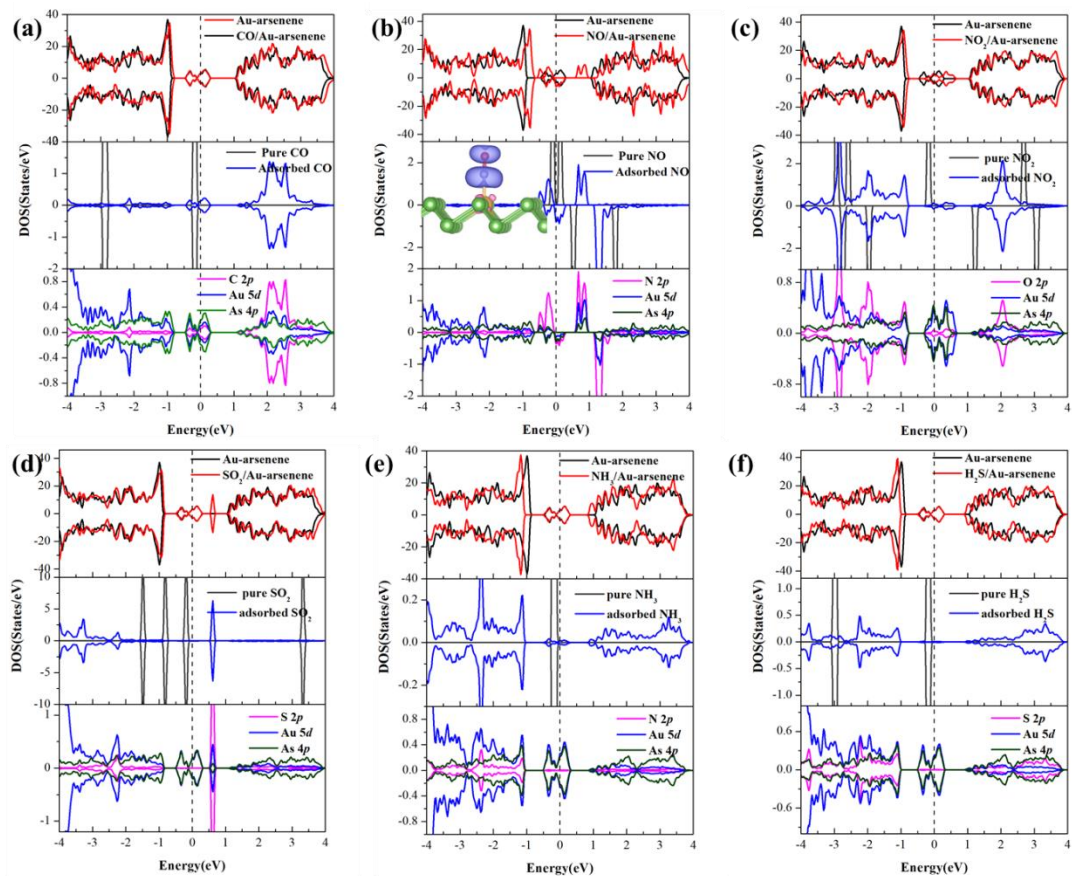

**Figure S5** (a)-(f) Density of states (PDOS) for considered gas molecules CO, NO, NO<sub>2</sub>, SO<sub>2</sub>, NH<sub>3</sub> and H<sub>2</sub>S adsorbed at Au-arsenene, respectively.  $E_F$  is set to be 0 eV denoted by dash lines. The magnetization charge density difference for NO/Au-arsenene is plotted in the insert of (b) and the magnetization charge density isosurface value is  $0.001e/\text{\AA}^3$ .

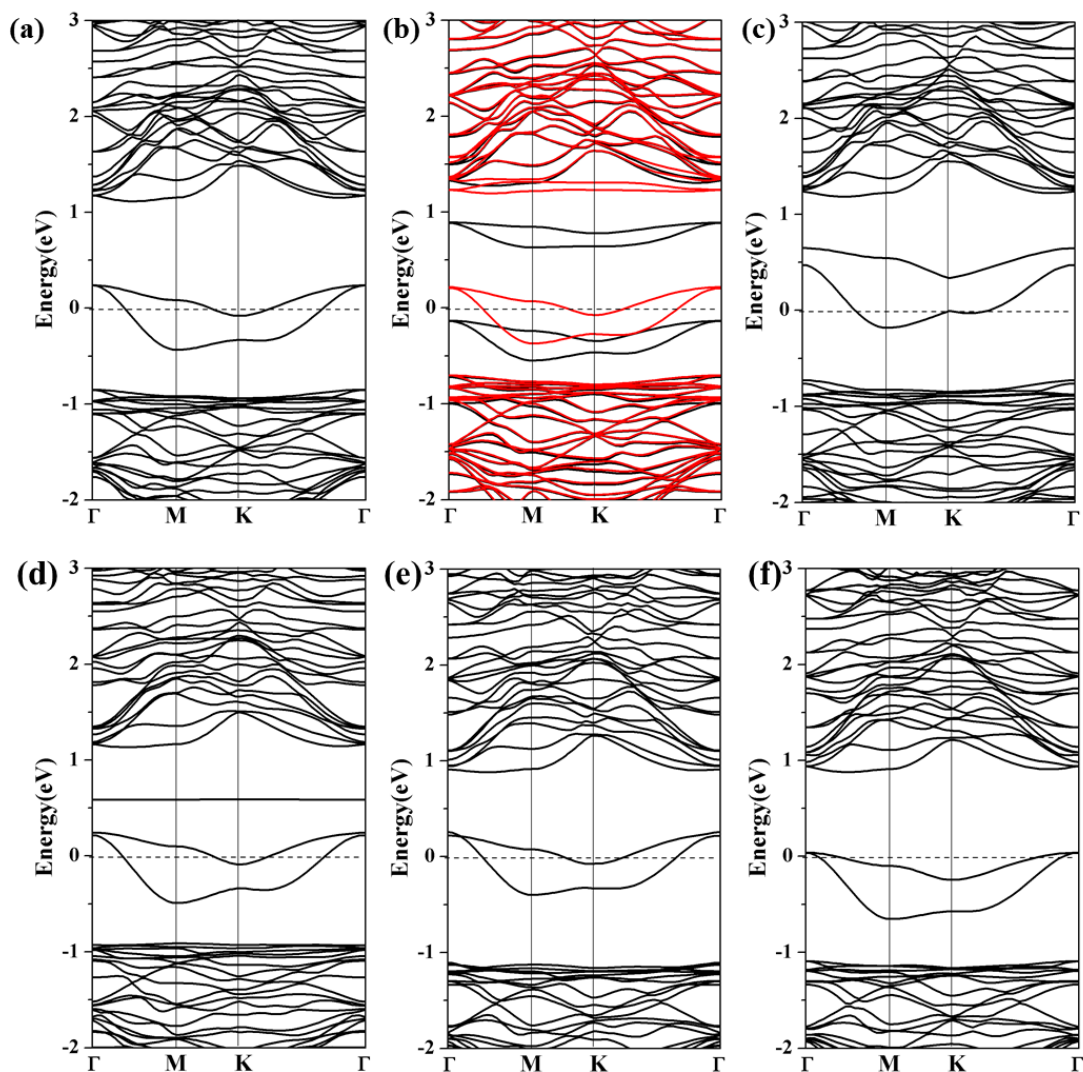

**Figure S6** (a)-(f) Spin-polarized band structures for CO, NO, NO<sub>2</sub>, SO<sub>2</sub>, NH<sub>3</sub> and H<sub>2</sub>S adsorbed at Au-arsenene, respectively. The black and red lines show spin up and spin down band structures, respectively.  $E_F$  is set to be 0eV denoted by the black dash lines.

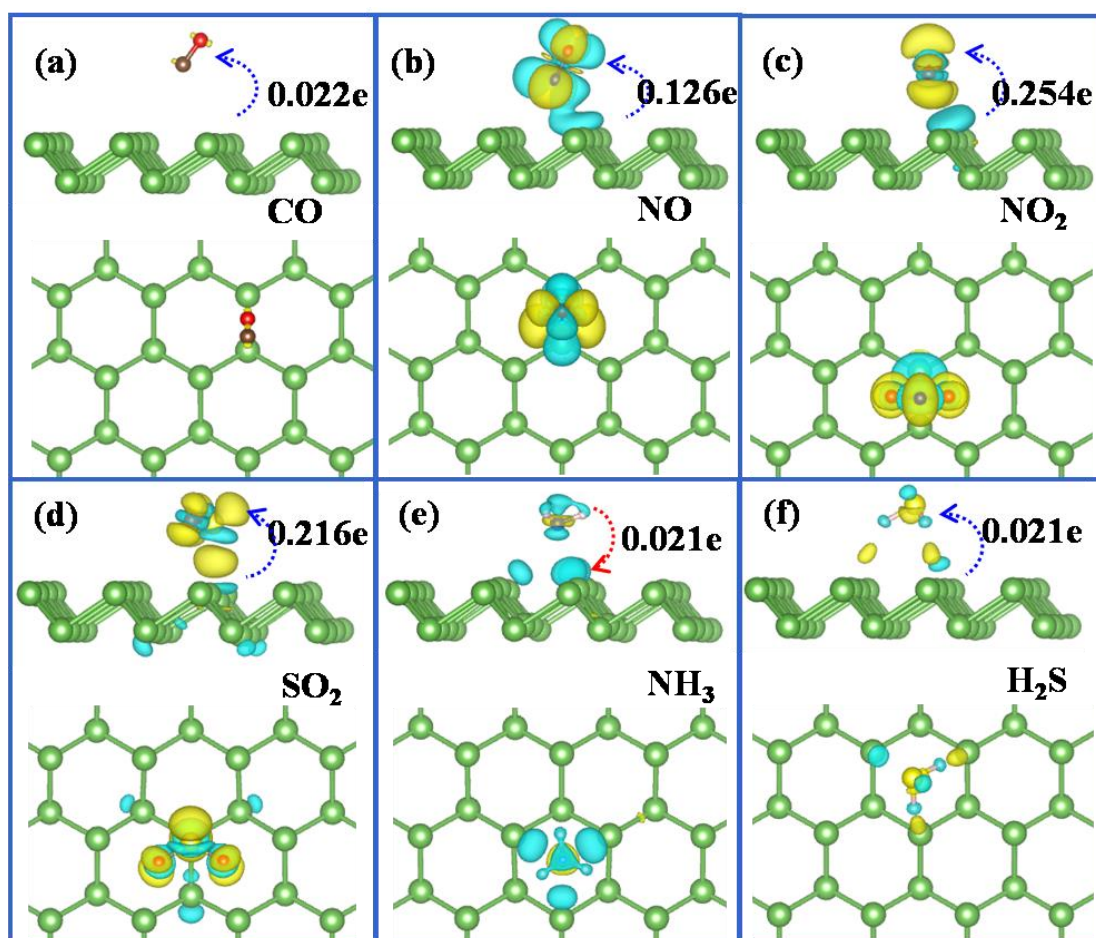

Figure S7 (a)-(f) Top (upper panel) and side views (lower panel) of the charge density difference for the most favorable configurations of pristine arsenene with adsorption of CO, NO, NO<sub>2</sub>, SO<sub>2</sub>, NH<sub>3</sub> and H<sub>2</sub>S, respectively.
